# Supplementary material for: Identification of a Novel HBV Encoded miRNA Using Next Generation Sequencing
Source: MDPI journal article supplement (doi:10.3390/v14061223), 2022-06-05
Supplement: s1 [file s1]

**Supplementary Table S1. List of Primers**

| miRNA                    | Sequence                                                               |
|--------------------------|------------------------------------------------------------------------|
| Oligo-dT adapter primer  | 5'-CATAGACCTGAATGGCGGTAAGGGTGTGGTAGGCGAGACA<br>TTTTTTTTTTTTTTTTTTTT-3' |
| Universal reverse primer | 5'-GCATAGACCTGAATGGCGGTA-3'                                            |
| IFNa_Foward              | 5'-GCTTTACTGATGGTCCTGGTGGTG-3'                                         |
| IFNa_Reverse             | 5'-GAGATTCTGCTCATTTGTGCCAG-3'                                          |
| IFNb_Foward              | 5'-GAATGGGAGGCTTGAATACTGCCT-3'                                         |
| IFNb_Reverse             | 5'-TAGCAAAGATGTTCTGGAGCATCTC-3'                                        |
| RSAD2_Foward             | 5'-AAGTCCATCCTGGATGTTGGTG-3'                                           |
| RSAD2_Reverse            | 5'-TTCCGCTCTACCAATCCAGCT-3'                                            |
| ISG15_Foward             | 5'-CATCTTTGCCAGTACAGGAGCT-3'                                           |
| ISG15_Reverse            | 5'-ACACCTGGAATTCGTTGCC-3'                                              |
| IFI44L_Foward            | 5'-ATG TTCAGCTGTACCCTCCAC-3'                                           |
| IFI44L_Reverse           | 5'-TGCCTACACTGCACTTCCTGTC-3'                                           |
| IFI27_Foward             | 5'-TAGCAGCCAAGATGATGTCCG-3'                                            |
| IFI27_Reverse            | 5'-AGAGTCCAGTTGCTCCCACTGA-3'                                           |
| HBV-miR-A_Stemloop       | 5'-GTCGTATCCAGTGCAGGGTCCGAGGTATTGCGACTGGATACGACAGAGAA-3'               |

|                     |                                                           |
|---------------------|-----------------------------------------------------------|
| HBV-miR-A _ Forward | 5'-GTATACGACTCGTGGTGGACT-3'                               |
| HBV-miR-B_Stemloop  | 5'-GTCGTATCCAGTGCAGGGTCCGAGGTATTTCGCACTGGATACGACCCAAAG-3' |
| HBV-miR-B _ Forward | 5'-GTATACACCAATTTTCTTTTG-3'                               |
| HBV-miR-C_Stemloop  | 5'-GTCGTATCCAGTGCAGGGTCCGAGGTATTTCGCACTGGATACGACAAGGTT-3' |
| HBV-miR-C _ Forward | 5'-GTATACCAGCGCATGCGTGGA-3'                               |
| Universal _ Reverse | 5'-GTGCAGGGTCCGAGGT-3'                                    |
| IFNA4 _ Forward     | 5'-TGCACAGAGCAAAGTCTTCA-3'                                |
| IFNA4 _ Reverse     | 5'-AAAAGGACAGGGCCATTGGG-3'                                |
| IFNA17 _ Forward    | 5'-GATCTGCCTCAGACCCACAG-3'                                |
| IFNA17 _ Reverse    | 5'-TCCTCCTGGGGAAGTCCAAA-3'                                |
| RAD50 _ Forward     | 5'-TTTGGTTGGACCCAATGGGG-3'                                |
| RAD50 _ Reverse     | 5'-CAGGAGGGAAATCTCCAGTACAA-3'                             |
| JMJD6 _ Forward     | 5'-TTGGACCCGGCACAATACTA-3'                                |
| JMJD6 _ Reverse     | 5'-TCTGCCCTTTCCACGTTATCC-3'                               |
| GOLGA6A _ Forward   | 5'-GAGCCCTGGTATTCCAGCAG-3'                                |
| GOLGA6A _ Reverse   | 5'-TTGTCACTGAGCTTGACTCCA-3'                               |
| METTL21A _ Forward  | 5'-GAGGAGACCACGGAATTTGGG-3'                               |
| METTL21A _ Reverse  | 5'-CAGGTATGTGGAAAGAACGATGG-3'                             |
| SCAF11 _ Forward    | 5'-ACTGTATGTACCCTAAATATGGGAG-3'                           |
| SCAF11 _ Reverse    | 5'-AGCCTCACTGTACAACAGACC-3'                               |

|                  |                               |
|------------------|-------------------------------|
| SRSF1_Foward     | 5'-TCGCGACGGCTATGATTACG-3'    |
| SRSF1_Reverse    | 5'-ACTTGGAGGCAGTCCAGAGA-3'    |
| EXD2_Foward      | 5'-GATTATGGCCTCGTTGTTAGGG-3'  |
| EXD2_Reverse     | 5'-ACTTCAGGCTAAGCCCATTACA-3'  |
| TMEM120B_Foward  | 5'-CTTACACTCCAGAGGTGCAAAC-3'  |
| TMEM120B_Reverse | 5'-CGCTCCTTGATGTTGCTG-3'      |
| LARP1B_Foward    | 5'-GCCAACACCAAGTGAATTAGTGA-3' |
| LARP1B_Reverse   | 5'-TTTGTTTCCCGGTTTTCTTGC-3'   |
| ZNF275_Foward    | 5'-TCTTTTGGGCGTTCCTGTTTT-3'   |
| ZNF275_Reverse   | 5'-GTCTGACACCAGTAGCACTTG-3'   |
| FSCB_Foward      | 5'-ATGGTAGGCAAATCCCAGCAA-3'   |
| FSCB_Reverse     | 5'-GGGTAGCTTTGGGGCTAGATG-3'   |
| WIPF2_Foward     | 5'-TGTCCGGTCTTTCTTGGATGA-3'   |
| WIPF2_Reverse    | 5'-GGCAGCTCGGTTTGTTC-3'       |
| FCGRT_Foward     | 5'-GATGAGCACCCTACTGCTG-3'     |
| FCGRT_Reverse    | 5'-CAAGACACCGATGACGATTCC-3'   |
| EIF5A2_Foward    | 5'-GGACGACCATGCAAAATAGTGG-3'  |
| EIF5A2_Reverse   | 5'-TGCCCGTGAAAATATCAATTCCA-3' |
| SHQ1_Foward      | 5'-CAAGTTCTACGCCAAGCCATA-3'   |
| SHQ1_Reverse     | 5'-TGGGCAGGCGAATGGTAAAAA-3'   |

|                |                             |
|----------------|-----------------------------|
| PET117_Forward | 5'-CTAGGAGCTCGAAGGTGGTG-3'  |
| PET117_Reverse | 5'-GATAACTCCGTCACGAAGCCT-3' |
