# Supplementary material for: Identification of a Novel HBV Encoded miRNA Using Next Generation Sequencing
Source: MDPI journal article supplement (doi:10.3390/v14061223), 2022-06-05
Supplement: s1 [file s1]

**Supplementary Table S2. Potentially gene targeted of HBV-miR-6.**

| Target Rank | Target Score | Gene Symbol | Gene Description                                  |
|-------------|--------------|-------------|---------------------------------------------------|
| 1           | 92           | GOLGA6A     | Golgin A6 Family Member A                         |
| 2           | 88           | METTL21A    | Methyltransferase 21A                             |
| 3           | 85           | SLC12A1     | Solute Carrier Family 12 Member 1                 |
| 4           | 83           | GOLGA6C     | Golgin A6 Family Member C                         |
| 5           | 82           | SCAF11      | SR-Related CTD Associated Factor 11               |
| 6           | 67           | SRSF1       | Serine And Arginine Rich Splicing Factor 1        |
| 7           | 66           | EXD2        | Exonuclease 3'-5' Domain Containing 2             |
| 8           | 65           | THEM120B    | Transmembrane Protein 120B                        |
| 9           | 64           | LARP1B      | La Ribonucleoprotein 1B                           |
| 10          | 62           | ZNF275      | Zinc Finger Protein 275                           |
| 11          | 61           | RAD50       | RAD50 Double Strand Break Repair Protein          |
| 12          | 61           | FSCB        | Fibrous Sheath CABYR Binding Protein              |
| 13          | 58           | WIPF2       | WAS/WASL Interacting Protein Family Member 2      |
| 14          | 58           | FCGRT       | Fc Gamma Receptor And Transporte                  |
| 15          | 57           | EIF5A2      | Eukaryotic Translation Initiation Factor 5A2      |
| 16          | 55           | MAN2B2      | Mannosidase Alpha Class 2B Member 2               |
| 17          | 55           | SLC36A2     | Solute Carrier Family 36 Member 2                 |
| 18          | 55           | JMJD6       | Jumonji Domain Containing 6                       |
| 19          | 54           | SHQ1        | SHQ1, H/ACA Ribonucleoprotein Assembly Factor     |
| 20          | 53           | PET117      | PET117 Cytochrome C Oxidase Chaperon              |
| 21          | 51           | IFNA4       | Interferon Alpha 4                                |
| 22          | 51           | IFNA17      | Interferon Alpha 17                               |
| 23          | 50           | NUBPL       | nucleotide-binding protein-like                   |
| 24          | 50           | CRAMP1      | Cramped Chromatin Regulator Homolog 1             |
| 25          | 50           | ATPCKMT     | ATP Synthase C Subunit Lysine N-Methyltransferase |
